# Supplementary material
Source: publisher figshare collection journal article supplement (https://sage.figshare.com/ndownloader/files/13569092)
Supplement: Supplementary file 1 [file 13569092]

# **Exposure to Adverse Childhood Experiences and Oral Health Measures in Adulthood: Findings from the 2010 Behavioral Risk Factor Surveillance System**

A.A. Akinkugbe, K.B. Hood, and T.H. Brickhouse

## **Appendix**

### **Adverse Childhood Events questions on the 2010 Behavioral Risk Factor Surveillance System Survey.**

1. Did you live with anyone who was depressed, mentally ill, or suicidal? *(Yes, No, Don't Know/Not sure, Refused)*
2. Did you live with anyone who was a problem drinker or alcoholic? *(Yes, No, Don't Know/Not sure, Refused)*
3. Did you live with anyone who used illegal street drugs or who abused prescription medications? *(Yes, No, Don't Know/Not sure, Refused)*
4. Did you live with anyone who served time or was sentenced to serve time in a prison, jail, or other correctional facility? *(Yes, No, Don't Know/Not sure, Refused)*
5. Were your parents separated or divorced? *(Yes, No, Don't Know/Not sure, Parents not married, Refused)*
6. How often did your parents or adults in your home ever slap, hit, kick, punch or beat each other up? *(Never, Once, more than once, Don't know/Not Sure, Refused)*
7. Before age 18, how often did a parent or adult in your home ever hit, beat, kick, or physically hurt you in any way? Do not include spanking. Would you say--- *(Never, Once, more than once, Don't know/Not Sure, Refused)*
8. How often did a parent or adult in your home ever swear at you, insult you, or put you down? *(Never, Once, more than once, Don't know/Not Sure, Refused)*
9. How often did anyone at least 5 years older than you or an adult, ever touch you sexually? *(Never, Once, more than once, Don't know/Not Sure, Refused)*
10. How often did anyone at least 5 years older than you or an adult, try to make you touch them sexually? *(Never, Once, more than once, Don't know/Not Sure, Refused)*
11. How often did anyone at least 5 years older than you or an adult, force you to have sex? *(Never, Once, more than once, Don't know/Not Sure, Refused)*
